# Supplementary material for: Development of 4,4′-bibenzo[c]thiophene fluorophores with substituents on the thiophene rings
Source: Royal Society of Chemistry journal article supplement (doi:10.1039/d1nj03153h), 2021-01-01
Supplement: d1nj03153h1.pdf [file d1nj03153h1.pdf]

## Supplementary Information

### Development of 4,4'-bibenzo[*c*]thiophene fluorophores with substituents on the thiophene rings

Kotaro Obayashi,<sup>a</sup> Saori Miho,<sup>a</sup> Masataka Yasui,<sup>a</sup> Keiichi Imato,<sup>a</sup> Seiji Akiyama,<sup>b</sup> Mio Ishida,<sup>b</sup> and Yousuke Ooyama\*<sup>a</sup>

<sup>a</sup>*Department of Applied Chemistry, Graduate School of Engineering, Hiroshima University, 1-4-1 Kagamiyama, Higashi-Hiroshima 739-8527, Japan. E-mail: yooyama@hiroshima-u.ac.jp; Fax: (+81) 82-424-5494*

<sup>b</sup>*Science & Innovation Center, Mitsubishi Chemical Corporation, 1000 Kamoshida-cho, Aoba-ku, Yokohama-shi, Kanagawa 227-8502, Japan*

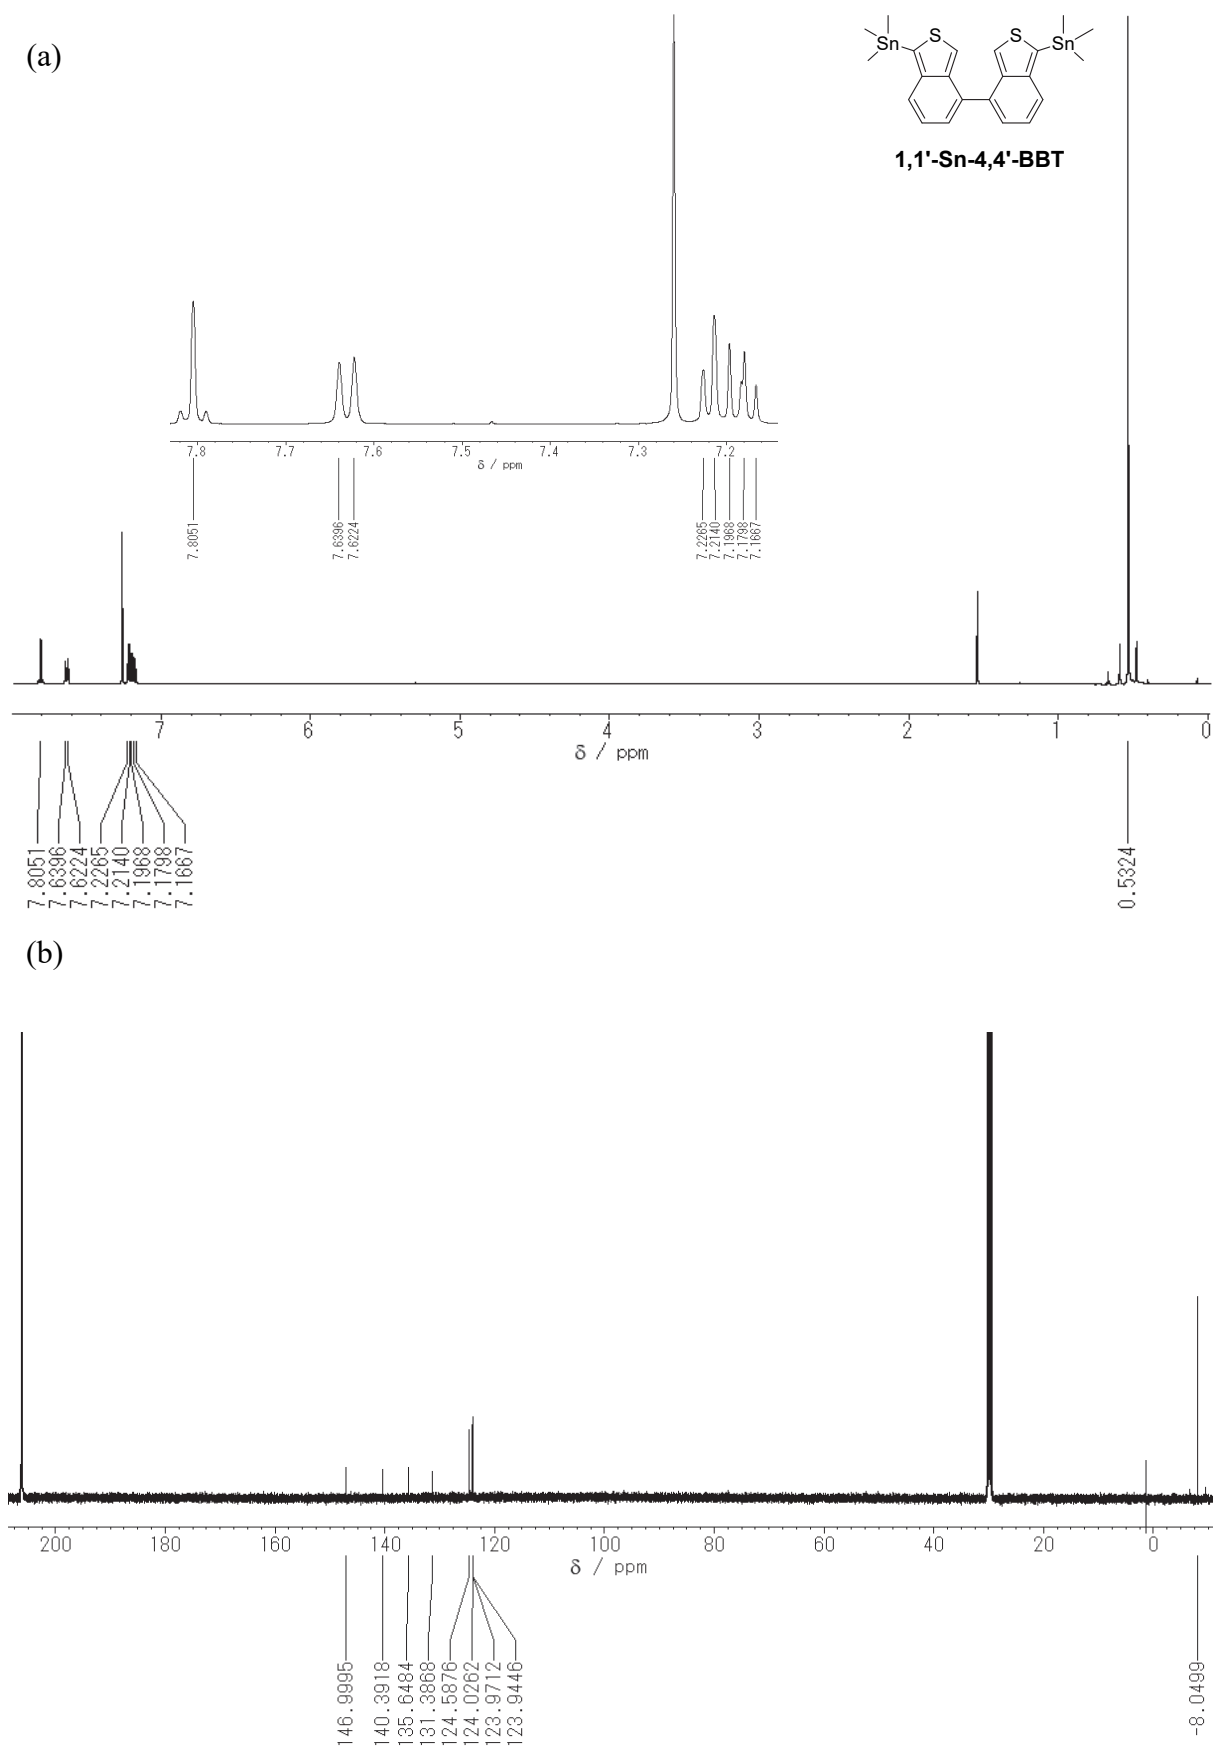

**Fig. S1** (a)  $^1\text{H}$  NMR (500 MHz) spectrum of **1,1'-Sn-4,4'-BBT** in  $\text{CDCl}_3$ . (b)  $^{13}\text{C}$  NMR (125 MHz) spectrum of **1,1'-Sn-4,4'-BBT** in  $\text{acetone-}d_6$ .

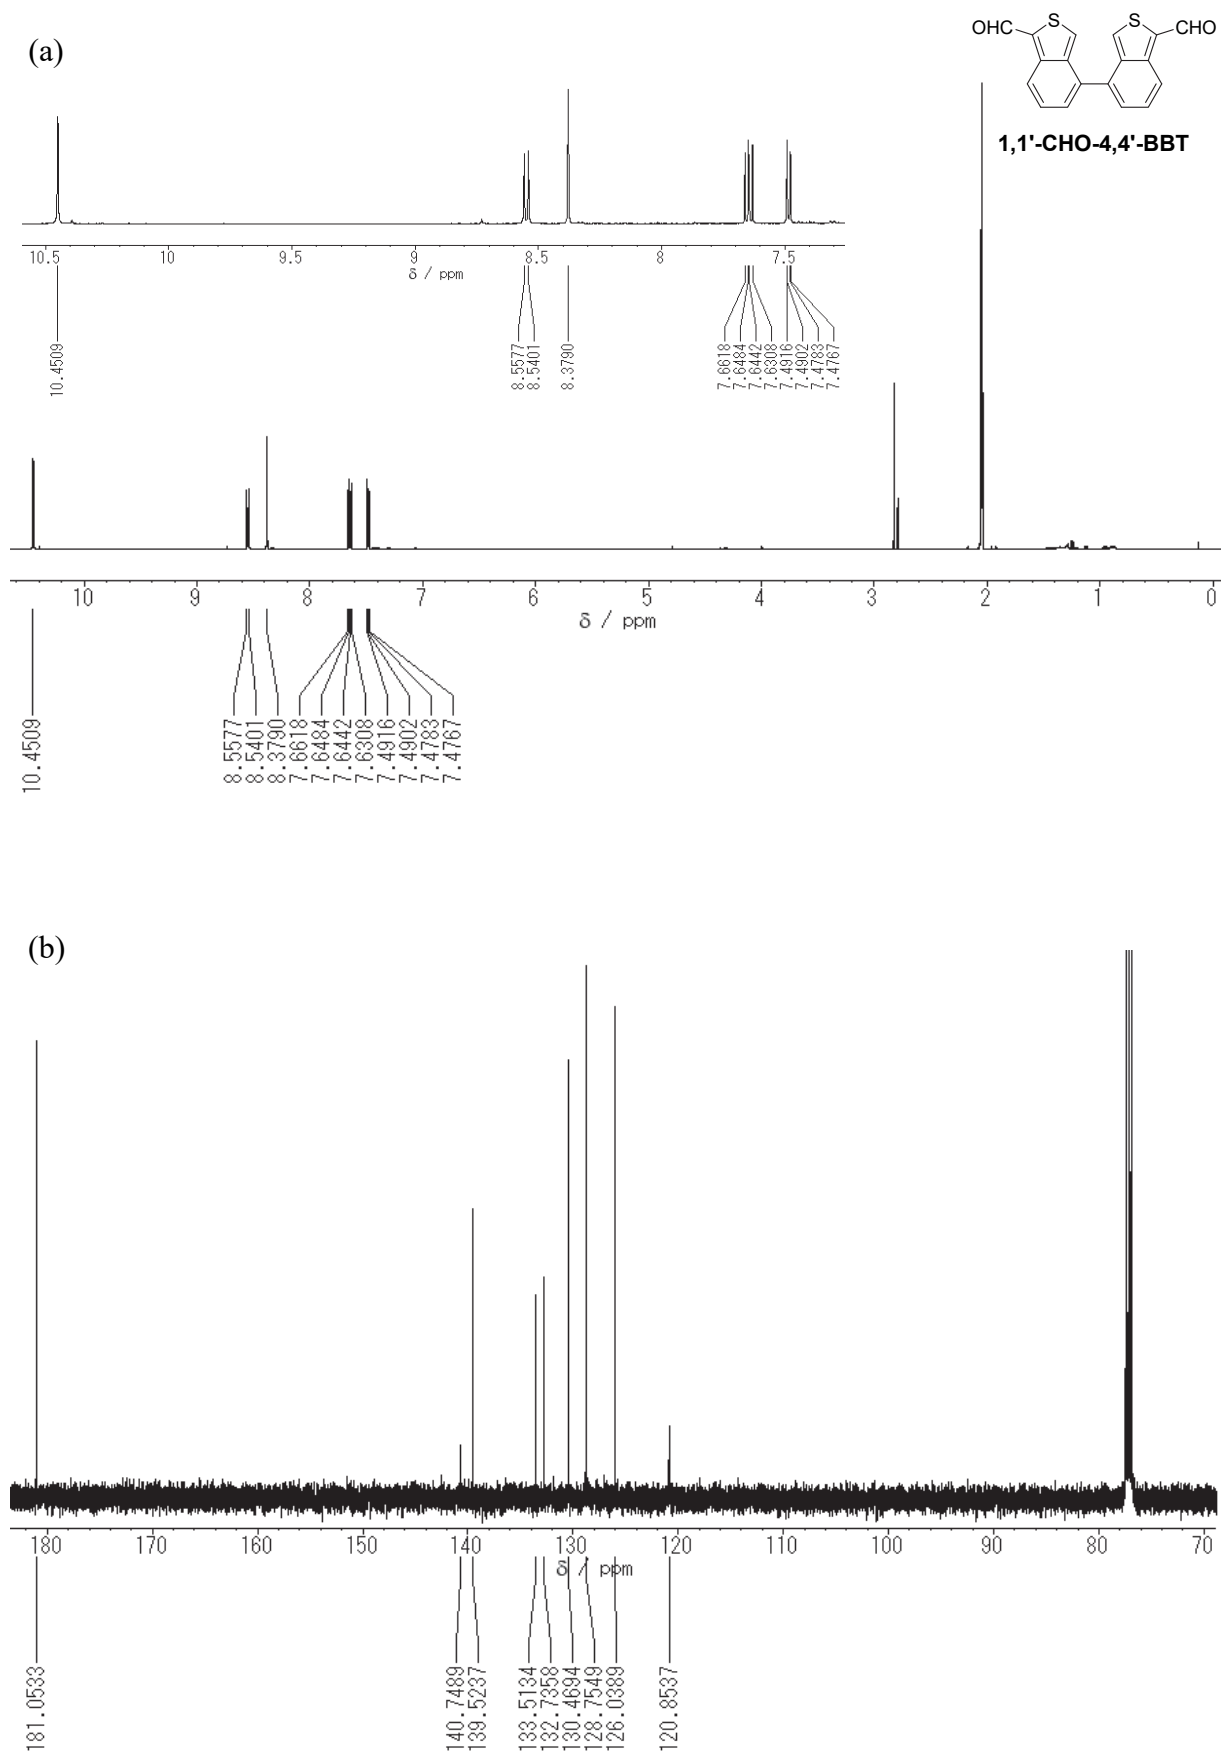

**Fig. S2** (a)  $^1\text{H}$  NMR (500 MHz) spectrum of **1,1'-CHO-4,4'-BBT** in acetone- $d_6$ . (b)  $^{13}\text{C}$  NMR (125 MHz) spectrum of **1,1'-CHO-4,4'-BBT** in  $\text{CDCl}_3$ .

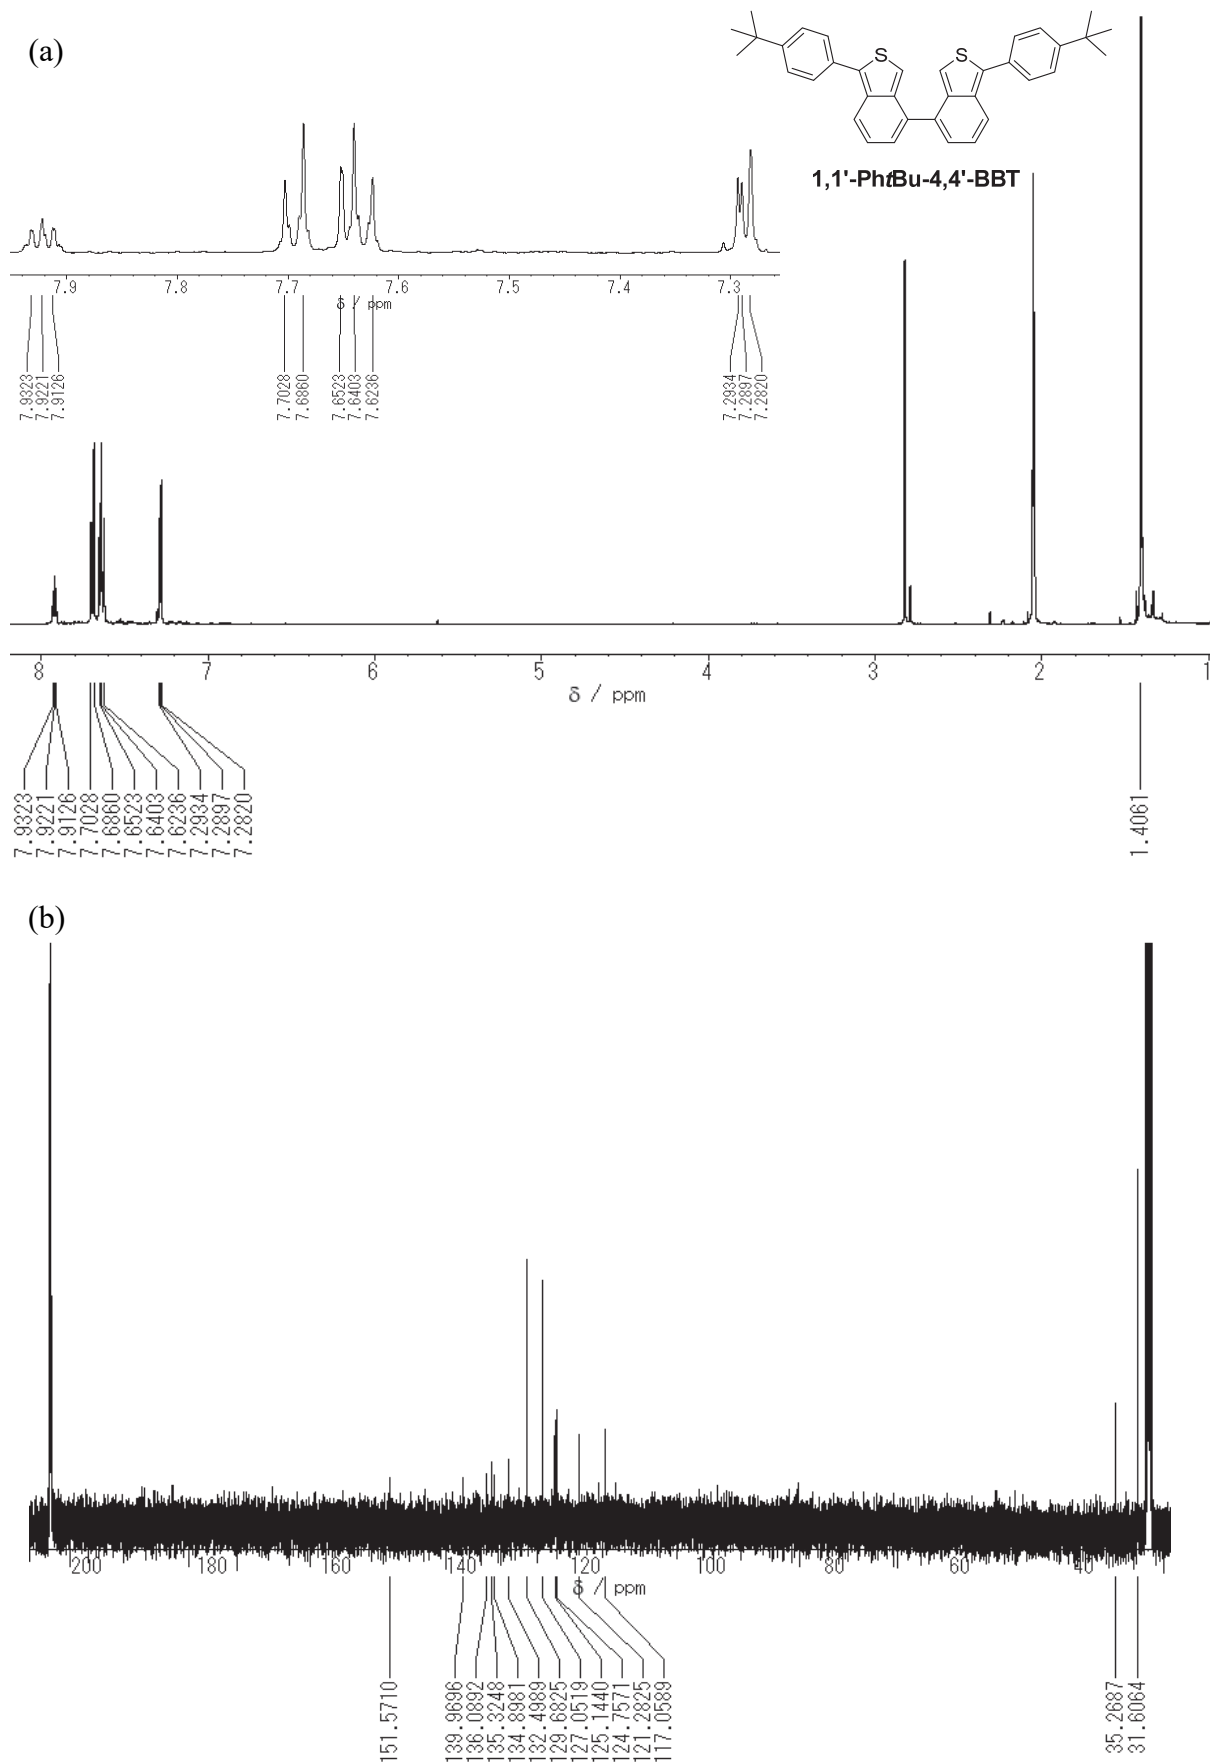

**Fig. S3** (a)  $^1\text{H}$  NMR (500 MHz) and (b)  $^{13}\text{C}$  NMR (125 MHz) spectra of **1,1'-PhtBu-4,4'-BBT** in acetone- $d_6$ .

**Table S1** Geometrical coordinates of the optimized **BT** by DFT at the B3LYP/LanL2DZ level.

Cartesian coordinates:

| Center Number | Atomic Number | Atomic Type | Coordinates (Angstroms) |           |           |
|---------------|---------------|-------------|-------------------------|-----------|-----------|
|               |               |             | X                       | Y         | Z         |
| 1             | C             | 0           | 0.076458                | 0.733622  | -0.000045 |
| 2             | C             | 0           | 2.514521                | 0.723431  | -0.000267 |
| 3             | C             | 0           | 2.514521                | -0.72343  | -0.00029  |
| 4             | C             | 0           | 1.335286                | -1.439354 | -0.000202 |
| 5             | C             | 0           | 0.076457                | -0.733623 | -0.00007  |
| 6             | S             | 0           | -2.453815               | 0         | 0.000472  |
| 7             | H             | 0           | 3.468721                | 1.245275  | -0.000369 |
| 8             | H             | 0           | 3.468721                | -1.245275 | -0.00041  |
| 9             | H             | 0           | 1.342006                | -2.526545 | -0.00025  |
| 10            | C             | 0           | -1.205674               | 1.273618  | 0.000012  |
| 11            | H             | 0           | -1.50375                | 2.311902  | 0.000017  |
| 12            | C             | 0           | -1.205674               | -1.273618 | -0.000035 |
| 13            | H             | 0           | -1.503752               | -2.311901 | -0.000067 |
| 14            | C             | 0           | 1.335286                | 1.439354  | -0.000154 |
| 15            | H             | 0           | 1.342004                | 2.526545  | -0.000165 |

**Table S2** Geometrical coordinates of the optimized **4,4'-BBT** by DFT at the B3LYP/ LanL2DZ level.

Cartesian coordinates:

| Center Number | Atomic Number | Atomic Type | Coordinates (Angstroms) |           |           |
|---------------|---------------|-------------|-------------------------|-----------|-----------|
|               |               |             | X                       | Y         | Z         |
| 1             | C             | 0           | -3.036781               | 0.101272  | -0.255477 |
| 2             | C             | 0           | -3.493896               | 1.212826  | -1.050818 |
| 3             | C             | 0           | -2.601905               | 2.21064   | -1.381215 |
| 4             | C             | 0           | -1.223742               | 2.154138  | -0.958729 |
| 5             | C             | 0           | -0.716836               | 1.103596  | -0.209856 |
| 6             | C             | 0           | -1.633126               | 0.039572  | 0.173264  |
| 7             | S             | 0           | -2.81806                | -2.086434 | 1.192562  |
| 8             | C             | 0           | 1.633126                | 0.039572  | -0.173264 |
| 9             | C             | 0           | 0.716836                | 1.103596  | 0.209856  |
| 10            | C             | 0           | 1.223742                | 2.154138  | 0.958729  |
| 11            | C             | 0           | 2.601905                | 2.21064   | 1.381215  |
| 12            | C             | 0           | 3.493896                | 1.212826  | 1.050818  |
| 13            | C             | 0           | 3.036781                | 0.101272  | 0.255477  |
| 14            | S             | 0           | 2.81806                 | -2.086434 | -1.192562 |

|    |   |   |           |           |           |
|----|---|---|-----------|-----------|-----------|
| 15 | H | 0 | -4.530908 | 1.255347  | -1.373901 |
| 16 | H | 0 | -2.927571 | 3.059247  | -1.978086 |
| 17 | H | 0 | -0.554283 | 2.955677  | -1.260949 |
| 18 | H | 0 | 0.554284  | 2.955677  | 1.26095   |
| 19 | H | 0 | 2.927571  | 3.059247  | 1.978086  |
| 20 | H | 0 | 4.530908  | 1.255347  | 1.373901  |
| 21 | C | 0 | -3.794301 | -0.970681 | 0.205218  |
| 22 | H | 0 | -4.842953 | -1.173851 | 0.0444    |
| 23 | C | 0 | -1.369438 | -1.075061 | 0.964069  |
| 24 | H | 0 | -0.439489 | -1.371284 | 1.42387   |
| 25 | C | 0 | 1.369438  | -1.07506  | -0.964069 |
| 26 | H | 0 | 0.439489  | -1.371284 | -1.42387  |
| 27 | C | 0 | 3.794302  | -0.970681 | -0.205219 |
| 28 | H | 0 | 4.842954  | -1.173851 | -0.0444   |

**Table S3** Geometrical coordinates of the optimized **1,1'-Si-4,4'-BBT** by DFT at the B3LYP/ LanL2DZ level.

Cartesian coordinates:

| Center Number | Atomic Number | Atomic Type | Coordinates (Angstroms) |           |           |
|---------------|---------------|-------------|-------------------------|-----------|-----------|
|               |               |             | X                       | Y         | Z         |
| 1             | C             | 0           | -3.83307                | -0.499042 | 0.1008    |
| 2             | C             | 0           | -3.011865               | 0.570791  | 0.498118  |
| 3             | C             | 0           | -3.384166               | 1.680646  | 1.341904  |
| 4             | H             | 0           | -4.38433                | 1.729674  | 1.759265  |
| 5             | C             | 0           | -2.466951               | 2.674935  | 1.609445  |
| 6             | H             | 0           | -2.744526               | 3.513979  | 2.243112  |
| 7             | C             | 0           | -1.13082                | 2.627915  | 1.073121  |
| 8             | H             | 0           | -0.436359               | 3.425624  | 1.324801  |
| 9             | C             | 0           | -0.696051               | 1.584522  | 0.272144  |
| 10            | C             | 0           | -1.644721               | 0.527569  | -0.042311 |
| 11            | C             | 0           | -1.435932               | -0.57304  | -0.86682  |
| 12            | H             | 0           | -0.540557               | -0.851575 | -1.401113 |
| 13            | C             | 0           | 3.8331                  | -0.498905 | -0.100944 |
| 14            | C             | 0           | 3.011857                | 0.57094   | -0.498136 |
| 15            | C             | 0           | 3.384124                | 1.680885  | -1.341824 |
| 16            | H             | 0           | 4.384296                | 1.729995  | -1.759161 |
| 17            | C             | 0           | 2.466869                | 2.675164  | -1.609266 |
| 18            | H             | 0           | 2.744408                | 3.51428   | -2.242854 |

|    |   |   |           |           |           |
|----|---|---|-----------|-----------|-----------|
| 19 | C | 0 | 1.13074   | 2.628044  | -1.072942 |
| 20 | H | 0 | 0.436248  | 3.425745  | -1.324552 |
| 21 | C | 0 | 0.696014  | 1.584569  | -0.272045 |
| 22 | C | 0 | 1.644731  | 0.527631  | 0.042317  |
| 23 | C | 0 | 1.436008  | -0.573029 | 0.866776  |
| 24 | H | 0 | 0.540648  | -0.851629 | 1.401066  |
| 25 | C | 0 | -5.856969 | -2.788992 | 0.236472  |
| 26 | H | 0 | -5.224713 | -3.354045 | 0.933899  |
| 27 | H | 0 | -5.59234  | -3.1043   | -0.78078  |
| 28 | H | 0 | -6.898395 | -3.086545 | 0.417332  |
| 29 | C | 0 | -6.02059  | -0.516728 | 2.316434  |
| 30 | H | 0 | -5.190779 | -0.820189 | 2.967139  |
| 31 | H | 0 | -6.915676 | -1.065839 | 2.638516  |
| 32 | H | 0 | -6.210028 | 0.549986  | 2.487671  |
| 33 | C | 0 | -6.841222 | 0.055952  | -0.674295 |
| 34 | C | 0 | -6.587849 | -0.339572 | -2.155101 |
| 35 | H | 0 | -7.268509 | 0.220083  | -2.815243 |
| 36 | H | 0 | -6.76572  | -1.409454 | -2.330128 |
| 37 | H | 0 | -5.559971 | -0.11142  | -2.466013 |
| 38 | C | 0 | -6.631307 | 1.587873  | -0.525872 |
| 39 | H | 0 | -7.316651 | 2.126108  | -1.198783 |
| 40 | H | 0 | -5.60739  | 1.885038  | -0.78583  |
| 41 | H | 0 | -6.838747 | 1.934636  | 0.496422  |
| 42 | C | 0 | -8.312529 | -0.287653 | -0.304529 |
| 43 | H | 0 | -8.55138  | -0.010262 | 0.731427  |
| 44 | H | 0 | -8.52848  | -1.357704 | -0.42883  |
| 45 | H | 0 | -9.002288 | 0.264959  | -0.960953 |
| 46 | C | 0 | 5.856995  | -2.788823 | -0.238176 |
| 47 | H | 0 | 5.591407  | -3.105043 | 0.778544  |
| 48 | H | 0 | 6.898634  | -3.086099 | -0.41827  |
| 49 | H | 0 | 5.225484  | -3.353348 | -0.936705 |
| 50 | C | 0 | 6.02075   | -0.514917 | -2.316442 |
| 51 | H | 0 | 6.914625  | -1.065449 | -2.639476 |
| 52 | H | 0 | 6.21235   | 0.551631  | -2.48635  |
| 53 | H | 0 | 5.190159  | -0.815861 | -2.96731  |
| 54 | C | 0 | 6.841155  | 0.055473  | 0.674731  |
| 55 | C | 0 | 6.588175  | -0.341605 | 2.155187  |
| 56 | H | 0 | 7.26878   | 0.217602  | 2.815765  |
| 57 | H | 0 | 6.766412  | -1.411608 | 2.32911   |

|    |    |   |           |           |           |
|----|----|---|-----------|-----------|-----------|
| 58 | H  | 0 | 5.560285  | -0.114082 | 2.466522  |
| 59 | C  | 0 | 8.312493  | -0.287318 | 0.304333  |
| 60 | H  | 0 | 8.551024  | -0.008879 | -0.731415 |
| 61 | H  | 0 | 8.528818  | -1.357416 | 0.427578  |
| 62 | H  | 0 | 9.002221  | 0.264893  | 0.961126  |
| 63 | C  | 0 | 6.630717  | 1.587473  | 0.527865  |
| 64 | H  | 0 | 5.606742  | 1.884026  | 0.7883    |
| 65 | H  | 0 | 6.837834  | 1.935329  | -0.49412  |
| 66 | H  | 0 | 7.31601   | 2.125267  | 1.201179  |
| 67 | S  | 0 | -2.883713 | -1.589409 | -0.985951 |
| 68 | S  | 0 | 2.883841  | -1.589341 | 0.985836  |
| 69 | Si | 0 | -5.637667 | -0.920273 | 0.496114  |
| 70 | Si | 0 | 5.637687  | -0.919917 | -0.496452 |

**Table S4** Geometrical coordinates of the optimized **1,1'-Sn-4,4'-BBT** by DFT at the B3LYP/LanL2DZ level.

Cartesian coordinates:

| Center Number | Atomic Number | Atomic Type | Coordinates (Angstroms) |           |           |
|---------------|---------------|-------------|-------------------------|-----------|-----------|
|               |               |             | X                       | Y         | Z         |
| 1             | C             | 0           | 3.828683                | -0.218819 | 0.279787  |
| 2             | C             | 0           | 3.045749                | 0.849141  | -0.191384 |
| 3             | C             | 0           | 3.503891                | 1.961205  | -0.987729 |
| 4             | H             | 0           | 4.544608                | 2.011844  | -1.299625 |
| 5             | C             | 0           | 2.620003                | 2.958761  | -1.342636 |
| 6             | H             | 0           | 2.959455                | 3.801557  | -1.940224 |
| 7             | C             | 0           | 1.235978                | 2.907458  | -0.945214 |
| 8             | H             | 0           | 0.57076                 | 3.706336  | -1.263449 |
| 9             | C             | 0           | 0.720525                | 1.860257  | -0.198089 |
| 10            | C             | 0           | 1.630822                | 0.800229  | 0.207407  |
| 11            | C             | 0           | 1.343306                | -0.305985 | 1.00075   |
| 12            | H             | 0           | 0.400222                | -0.590309 | 1.441736  |
| 13            | C             | 0           | -3.828683               | -0.218819 | -0.279788 |
| 14            | C             | 0           | -3.045748               | 0.849141  | 0.191383  |
| 15            | C             | 0           | -3.503889               | 1.961203  | 0.987731  |
| 16            | H             | 0           | -4.544605               | 2.01184   | 1.29963   |
| 17            | C             | 0           | -2.620001               | 2.958759  | 1.342638  |
| 18            | H             | 0           | -2.959451               | 3.801553  | 1.940229  |
| 19            | C             | 0           | -1.235977               | 2.907457  | 0.945214  |



|    |    |   |           |           |           |
|----|----|---|-----------|-----------|-----------|
| 20 | H  | 0 | -0.570758 | 3.706332  | 1.263451  |
| 21 | C  | 0 | -0.720525 | 1.860258  | 0.198084  |
| 22 | C  | 0 | -1.630823 | 0.80023   | -0.207412 |
| 23 | C  | 0 | -1.343307 | -0.305984 | -1.000754 |
| 24 | H  | 0 | -0.400223 | -0.59031  | -1.441739 |
| 25 | C  | 0 | 6.330344  | -2.461268 | 1.028749  |
| 26 | H  | 0 | 5.733378  | -3.28737  | 0.622674  |
| 27 | H  | 0 | 6.107594  | -2.370635 | 2.099208  |
| 28 | H  | 0 | 7.391504  | -2.720283 | 0.920646  |
| 29 | C  | 0 | 6.297137  | -0.832803 | -2.095681 |
| 30 | H  | 0 | 5.718941  | -1.66627  | -2.513382 |
| 31 | H  | 0 | 7.363121  | -1.02768  | -2.271377 |
| 32 | H  | 0 | 6.019708  | 0.080201  | -2.637071 |
| 33 | C  | 0 | -6.330346 | -2.461268 | -1.028746 |
| 34 | H  | 0 | -6.107617 | -2.370626 | -2.099208 |
| 35 | H  | 0 | -7.391501 | -2.720293 | -0.920624 |
| 36 | H  | 0 | -5.733364 | -3.287366 | -0.622687 |
| 37 | C  | 0 | -6.297129 | -0.832802 | 2.095687  |
| 38 | H  | 0 | -7.363123 | -1.027623 | 2.271391  |
| 39 | H  | 0 | -6.019646 | 0.080182  | 2.637084  |
| 40 | H  | 0 | -5.718975 | -1.666305 | 2.513378  |
| 41 | S  | 0 | 2.780777  | -1.315925 | 1.262645  |
| 42 | S  | 0 | -2.780784 | -1.315911 | -1.262669 |
| 43 | Sn | 0 | 5.904347  | -0.633837 | 0.002298  |
| 44 | Sn | 0 | -5.904347 | -0.633838 | -0.002293 |
| 45 | C  | 0 | -7.052068 | 0.981097  | -0.820689 |
| 46 | H  | 0 | -8.125698 | 0.802384  | -0.677307 |
| 47 | H  | 0 | -6.793175 | 1.932155  | -0.338967 |
| 48 | H  | 0 | -6.857267 | 1.078993  | -1.895803 |
| 49 | C  | 0 | 7.052066  | 0.981098  | 0.820699  |
| 50 | H  | 0 | 8.125698  | 0.80236   | 0.677367  |
| 51 | H  | 0 | 6.793212  | 1.932149  | 0.338942  |
| 52 | H  | 0 | 6.857221  | 1.079025  | 1.895802  |

**Table S5** Geometrical coordinates of the optimized **1,1'-CHO-4,4'-BBT** by DFT at the B3LYP/LanL2DZ level.

Cartesian coordinates:

Center Atomic Atomic Coordinates (Angstroms)

| Number | Number | Type | X         | Y         | Z         |
|--------|--------|------|-----------|-----------|-----------|
| 1      | C      | 0    | -3.020352 | 0.404723  | -0.325363 |
| 2      | C      | 0    | -3.458925 | 1.500307  | -1.142946 |
| 3      | C      | 0    | -2.559845 | 2.501672  | -1.45987  |
| 4      | C      | 0    | -1.197107 | 2.463889  | -1.004027 |
| 5      | C      | 0    | -0.710354 | 1.420836  | -0.229588 |
| 6      | C      | 0    | -1.634738 | 0.364344  | 0.135899  |
| 7      | S      | 0    | -2.799259 | -1.776787 | 1.174265  |
| 8      | C      | 0    | 1.634738  | 0.364344  | -0.135899 |
| 9      | C      | 0    | 0.710354  | 1.420836  | 0.229588  |
| 10     | C      | 0    | 1.197107  | 2.463889  | 1.004027  |
| 11     | C      | 0    | 2.559845  | 2.501672  | 1.459869  |
| 12     | C      | 0    | 3.458925  | 1.500307  | 1.142946  |
| 13     | C      | 0    | 3.020352  | 0.404723  | 0.325363  |
| 14     | S      | 0    | 2.799259  | -1.776788 | -1.174264 |
| 15     | H      | 0    | -4.482565 | 1.546815  | -1.501687 |
| 16     | H      | 0    | -2.878381 | 3.339717  | -2.074773 |
| 17     | H      | 0    | -0.524766 | 3.265893  | -1.296814 |
| 18     | H      | 0    | 0.524767  | 3.265893  | 1.296814  |
| 19     | H      | 0    | 2.878381  | 3.339717  | 2.074772  |
| 20     | H      | 0    | 4.482566  | 1.546815  | 1.501687  |
| 21     | C      | 0    | -3.786412 | -0.685153 | 0.136872  |
| 22     | C      | 0    | -1.385467 | -0.742776 | 0.952558  |
| 23     | H      | 0    | -0.458779 | -1.00568  | 1.44104   |
| 24     | C      | 0    | 1.385467  | -0.742775 | -0.952559 |
| 25     | H      | 0    | 0.45878   | -1.005679 | -1.441041 |
| 26     | C      | 0    | 3.786412  | -0.685153 | -0.136872 |
| 27     | C      | 0    | -5.181563 | -0.987333 | -0.112246 |
| 28     | O      | 0    | -5.792149 | -1.988157 | 0.340741  |
| 29     | H      | 0    | -5.706998 | -0.25595  | -0.753784 |
| 30     | C      | 0    | 5.181563  | -0.987333 | 0.112245  |
| 31     | O      | 0    | 5.79215   | -1.988157 | -0.340742 |
| 32     | H      | 0    | 5.706999  | -0.255949 | 0.753783  |

**Table S6** Geometrical coordinates of the optimized **1,1'-PhtBu-4,4'-BBT** by DFT at the B3LYP/LanL2DZ level.

Cartesian coordinates:

Center Atomic Atomic Coordinates (Angstroms)

| Number | Number | Type | X         | Y         | Z         |
|--------|--------|------|-----------|-----------|-----------|
| 1      | C      | 0    | 3.050231  | 1.059743  | 0.146694  |
| 2      | C      | 0    | 3.504894  | 2.137496  | 0.989588  |
| 3      | C      | 0    | 2.61558   | 3.119076  | 1.374816  |
| 4      | C      | 0    | 1.234634  | 3.084019  | 0.964673  |
| 5      | C      | 0    | 0.721134  | 2.052422  | 0.196255  |
| 6      | C      | 0    | 1.633079  | 1.003457  | -0.232911 |
| 7      | S      | 0    | 2.761794  | -1.111607 | -1.324343 |
| 8      | C      | 0    | -1.633079 | 1.00346   | 0.232899  |
| 9      | C      | 0    | -0.721134 | 2.05242   | -0.196278 |
| 10     | C      | 0    | -1.234634 | 3.084009  | -0.964707 |
| 11     | C      | 0    | -2.61558  | 3.119062  | -1.37485  |
| 12     | C      | 0    | -3.504894 | 2.137485  | -0.989612 |
| 13     | C      | 0    | -3.050231 | 1.059741  | -0.146706 |
| 14     | S      | 0    | -2.761794 | -1.111593 | 1.324354  |
| 15     | H      | 0    | 4.534973  | 2.160789  | 1.329921  |
| 16     | H      | 0    | 2.948004  | 3.933089  | 2.014657  |
| 17     | H      | 0    | 0.568135  | 3.87502   | 1.299497  |
| 18     | H      | 0    | -0.568135 | 3.875006  | -1.299539 |
| 19     | H      | 0    | -2.948004 | 3.933067  | -2.0147   |
| 20     | H      | 0    | -4.534973 | 2.160774  | -1.329945 |
| 21     | C      | 0    | 3.812477  | -0.005257 | -0.357193 |
| 22     | C      | 0    | 1.332595  | -0.100419 | -1.023765 |
| 23     | H      | 0    | 0.381995  | -0.385209 | -1.447304 |
| 24     | C      | 0    | -1.332595 | -0.100408 | 1.023765  |
| 25     | H      | 0    | -0.381994 | -0.385193 | 1.447307  |
| 26     | C      | 0    | -3.812477 | -0.005253 | 0.357192  |
| 27     | C      | 0    | -5.249909 | -0.288695 | 0.233806  |
| 28     | C      | 0    | -6.214004 | 0.74588   | 0.302447  |
| 29     | C      | 0    | -5.729318 | -1.613427 | 0.06613   |
| 30     | C      | 0    | -7.587735 | 0.469609  | 0.190705  |
| 31     | H      | 0    | -5.891456 | 1.767417  | 0.483077  |
| 32     | C      | 0    | -7.100216 | -1.880328 | -0.035236 |
| 33     | H      | 0    | -5.018006 | -2.433652 | -0.002453 |
| 34     | C      | 0    | -8.068506 | -0.84691  | 0.018099  |
| 35     | H      | 0    | -8.284142 | 1.299239  | 0.25567   |
| 36     | H      | 0    | -7.417424 | -2.912184 | -0.16644  |
| 37     | C      | 0    | 5.249909  | -0.288698 | -0.233804 |
| 38     | C      | 0    | 5.729318  | -1.613428 | -0.066112 |

|    |   |   |            |           |           |
|----|---|---|------------|-----------|-----------|
| 39 | C | 0 | 6.214004   | 0.745877  | -0.302455 |
| 40 | C | 0 | 7.100216   | -1.880327 | 0.035257  |
| 41 | H | 0 | 5.018006   | -2.433652 | 0.002479  |
| 42 | C | 0 | 7.587736   | 0.469607  | -0.19071  |
| 43 | H | 0 | 5.891456   | 1.767412  | -0.483096 |
| 44 | C | 0 | 8.068506   | -0.84691  | -0.018089 |
| 45 | H | 0 | 7.417424   | -2.912182 | 0.166472  |
| 46 | H | 0 | 8.284142   | 1.299236  | -0.255684 |
| 47 | C | 0 | -9.570617  | -1.188206 | -0.104318 |
| 48 | C | 0 | -10.469852 | 0.070371  | -0.020536 |
| 49 | C | 0 | -9.832709  | -1.882722 | -1.473859 |
| 50 | C | 0 | -9.977581  | -2.154561 | 1.047566  |
| 51 | H | 0 | -10.356191 | 0.589157  | 0.940269  |
| 52 | H | 0 | -10.249381 | 0.782639  | -0.82633  |
| 53 | H | 0 | -11.523063 | -0.223073 | -0.116172 |
| 54 | H | 0 | -9.250219  | -2.805903 | -1.579573 |
| 55 | H | 0 | -10.895601 | -2.142867 | -1.570305 |
| 56 | H | 0 | -9.564371  | -1.219185 | -2.306061 |
| 57 | H | 0 | -11.04148  | -2.415689 | 0.96607   |
| 58 | H | 0 | -9.400105  | -3.086415 | 1.019362  |
| 59 | H | 0 | -9.812375  | -1.686767 | 2.026674  |
| 60 | C | 0 | 9.570617   | -1.188205 | 0.104332  |
| 61 | C | 0 | 9.832708   | -1.882707 | 1.47388   |
| 62 | C | 0 | 9.977581   | -2.154572 | -1.047541 |
| 63 | C | 0 | 10.469852  | 0.070371  | 0.020537  |
| 64 | H | 0 | 9.56437    | -1.219161 | 2.306076  |
| 65 | H | 0 | 9.250218   | -2.805886 | 1.579604  |
| 66 | H | 0 | 10.8956    | -2.142851 | 1.57033   |
| 67 | H | 0 | 9.812376   | -1.686788 | -2.026655 |
| 68 | H | 0 | 11.04148   | -2.415699 | -0.966042 |
| 69 | H | 0 | 9.400106   | -3.086426 | -1.019328 |
| 70 | H | 0 | 11.523063  | -0.223072 | 0.116177  |
| 71 | H | 0 | 10.356191  | 0.589147  | -0.940273 |
| 72 | H | 0 | 10.24938   | 0.782648  | 0.826323  |
